# Supplementary material
Source: Springer Nature journal article supplement (https://www.springermedizin.de/resource/supplementary/12885_2008_1341_MOESM1_ESM.pdf/9473046)

Newly diagnosed and confirmed early stage breast cancer

Conventional treatment

Surgery to remove  
primary tumor

Adjuvant chemotherapy  
and/or hormone therapy

Follow up and monitor  
for relapse

Proposed treatment

Determine level of  
endogenous Endostatin  
and raise to level typical  
of DS

Surgery to remove  
primary tumor

Continue to monitor  
Endostatin level and  
keep at level typical of  
DS

Follow up and monitor  
for relapse

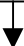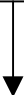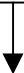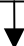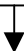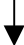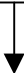

Supplement: MOESM1 [file 9473046]
